# Supplementary material for: Structural implications on the excitation dynamics of fluorescent 3H-indolium cations
Source: Royal Society of Chemistry journal article supplement (doi:10.1039/c7cp01841j), 2017-01-01
Supplement: c7cp01841j1.pdf [file c7cp01841j1.pdf]

Electronic Supplementary Information

# Structural implications on the excitation dynamics of fluorescent 3*H*-indolium cations

Ek Raj Thapaliya, Jaume Garcia-Amorós, Santi Nonell, Burjor Captain and

Françisco M. Raymo

---

|                               |     |
|-------------------------------|-----|
| • Synthesis .....             | S2  |
| • Crystallographic data ..... | S3  |
| • Computational data .....    | S4  |
| • Spectroscopic data .....    | S22 |

## Synthesis

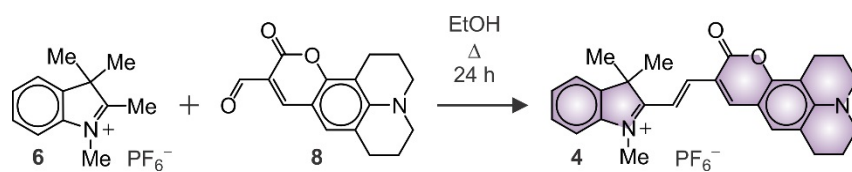

**Fig. S1.** Synthesis of the hexafluorophosphate salt of **4**.

## Crystallographic data

Table S1. Crystallographic data.

|                                                                          | <b>3•PF<sub>6</sub></b>                                                                                            | <b>3•I</b>                                                          |
|--------------------------------------------------------------------------|--------------------------------------------------------------------------------------------------------------------|---------------------------------------------------------------------|
| <i>Empirical Formula</i>                                                 | [C <sub>26</sub> H <sub>29</sub> N <sub>2</sub> O <sub>2</sub> ][PF <sub>6</sub> ]•CH <sub>2</sub> Cl <sub>2</sub> | [C <sub>26</sub> H <sub>29</sub> N <sub>2</sub> O <sub>2</sub> ][I] |
| <i>Formula Weight</i>                                                    | 631.41                                                                                                             | 528.41                                                              |
| <i>Crystal System</i>                                                    | Monoclinic                                                                                                         | Monoclinic                                                          |
| <i>Lattice Parameters:</i>                                               |                                                                                                                    |                                                                     |
| <i>a</i> (Å)                                                             | 8.4113(6)                                                                                                          | 19.3336(15)                                                         |
| <i>b</i> (Å)                                                             | 15.7520(12)                                                                                                        | 23.1519(18)                                                         |
| <i>c</i> (Å)                                                             | 21.6939(16)                                                                                                        | 14.0857(12)                                                         |
| <i>α</i> (°)                                                             | 90                                                                                                                 | 90                                                                  |
| <i>β</i> (°)                                                             | 95.386(1)                                                                                                          | 130.241(1)                                                          |
| <i>γ</i> (°)                                                             | 90                                                                                                                 | 90                                                                  |
| <i>V</i> (Å <sup>3</sup> )                                               | 2861.6(4)                                                                                                          | 4812.7(7)                                                           |
| <i>Space Group</i>                                                       | <i>P2<sub>1</sub>/c</i> (# 14)                                                                                     | <i>C2/c</i> (# 14)                                                  |
| <i>Z</i> Value                                                           | 4                                                                                                                  | 8                                                                   |
| <i>ρ<sub>calc</sub></i> (g cm <sup>-3</sup> )                            | 1.466                                                                                                              | 1.459                                                               |
| <i>μ</i> (Mo Kα) (mm <sup>-1</sup> )                                     | 0.351                                                                                                              | 1.355                                                               |
| <i>T</i> (K)                                                             | 100                                                                                                                | 296                                                                 |
| <i>2θ<sub>max</sub></i> (°)                                              | 50.0                                                                                                               | 54.0                                                                |
| <i>No. Obs.</i> ( <i>I</i> > 2σ( <i>I</i> ))                             | 4014                                                                                                               | 3451                                                                |
| <i>No. Parameters</i>                                                    | 366                                                                                                                | 286                                                                 |
| <i>Goodness of Fit</i>                                                   | 1.034                                                                                                              | 1.010                                                               |
| <i>Max. Shift in Cycle</i>                                               | 0.000                                                                                                              | 0.001                                                               |
| <i>Residuals*:</i> R1; wR2                                               | 0.0802; 0.2262                                                                                                     | 0.0390; 0.0765                                                      |
| <i>Absorption Correction,</i><br><i>Max/min</i>                          | Multi-Scan,<br>0.7457/0.6534                                                                                       | Multi-Scan,<br>0.7457/0.6125                                        |
| <i>Largest Peak in Final Diff. Map</i> (e <sup>-</sup> Å <sup>-3</sup> ) | 3.776                                                                                                              | 0.594                                                               |

$$* R1 = \sum_{hkl} (| |F_{obs}| - |F_{calc}| |) / \sum_{hkl} |F_{obs}|; wR2 = [\sum_{hkl} w(|F_{obs}| - |F_{calc}|)^2 / \sum_{hkl} wF_{obs}^2]^{1/2}$$

$$w = 1/\sigma^2(F_{obs}); GOF = [\sum_{hkl} w(|F_{obs}| - |F_{calc}|)^2 / (n_{data} - n_{var})]^{1/2}.$$

## Computational data

**Table S2.** Calculated free-energy barriers for the conformational and configurational interconversions of **3** [a].

| <i>Process</i>          | $\Delta G^\ddagger$<br>(kcal mol <sup>-1</sup> ) |
|-------------------------|--------------------------------------------------|
| <i>ttc</i> → <i>ttt</i> | 12.50                                            |
| <i>ttt</i> → <i>ctt</i> | 10.07                                            |
| <i>ctt</i> → <i>ctc</i> | 12.08                                            |
| <i>ctc</i> → <i>ctt</i> | 11.78                                            |
| <i>ctt</i> → <i>ttt</i> | 7.51                                             |
| <i>ttt</i> → <i>ttc</i> | 13.60                                            |
| <i>ttc</i> → <i>tcc</i> | 25.38                                            |
| <i>tcc</i> → <i>ttc</i> | 17.81                                            |
| <i>ttt</i> → <i>tct</i> | 30.71                                            |
| <i>tct</i> → <i>ttt</i> | 21.18                                            |
| <i>ctt</i> → <i>cct</i> | 28.72                                            |
| <i>cct</i> → <i>ctt</i> | 21.76                                            |
| <i>ctc</i> → <i>ccc</i> | 25.38                                            |
| <i>ccc</i> → <i>ctc</i> | 18.02                                            |

[a] The free-energy barriers were computed with the restricted B3LYP functional, the 6-311+G(d,p) basis set and the IEFPCM solvation model for MeCN at 298 K.

**Table S3.** Calculated vertical energy ( $\Delta E$ ), wavelength ( $\lambda$ ), oscillator strength ( $f$ ) and main orbital pair with its contribution for electronic transitions from the ground state of the four conformational isomers of **3** with a *trans* configuration for their central [C=C] bond to the corresponding first singlet excited state [a].

| <i>Isomer</i> | $\Delta E$<br>(eV) | $\lambda_{Ab}$<br>(nm) | $f$    | <i>Main Orbital Pair</i> | <i>Contribution</i><br>(%) |
|---------------|--------------------|------------------------|--------|--------------------------|----------------------------|
| <i>ctt</i>    | 2.42               | 512                    | 1.7673 | [HOMO] → [LUMO]          | 99                         |
| <i>ttt</i>    | 2.40               | 516                    | 1.8522 | [HOMO] → [LUMO]          | 99                         |
| <i>ctc</i>    | 2.31               | 536                    | 1.6971 | [HOMO] → [LUMO]          | 99                         |
| <i>ttc</i>    | 2.31               | 536                    | 1.6969 | [HOMO] → [LUMO]          | 99                         |

[a] The photophysical parameters were computed with the restricted B3LYP functional, the 6-311+G(d,p) basis set and the IEFPCM solvation model for MeCN.

*Coordinates of the optimized geometry of ctt*

|   |              |              |              |
|---|--------------|--------------|--------------|
| N | 4.176876000  | -1.044568000 | -0.272775000 |
| C | 5.579615000  | -0.930525000 | -0.058250000 |
| C | 6.534949000  | -1.938746000 | -0.058470000 |
| H | 6.282100000  | -2.978478000 | -0.218829000 |
| C | 7.858505000  | -1.555821000 | 0.173070000  |
| H | 8.633277000  | -2.312932000 | 0.183444000  |
| C | 8.193815000  | -0.218137000 | 0.394288000  |
| H | 9.227966000  | 0.051834000  | 0.571804000  |
| C | 7.209820000  | 0.777003000  | 0.393657000  |
| H | 7.480107000  | 1.811812000  | 0.568332000  |
| C | 5.892329000  | 0.408203000  | 0.168251000  |
| C | 4.619932000  | 1.225010000  | 0.111727000  |
| C | 3.573939000  | 0.138659000  | -0.147396000 |
| C | 3.562680000  | -2.313850000 | -0.662600000 |
| H | 2.711779000  | -2.118569000 | -1.311556000 |
| H | 3.242814000  | -2.876460000 | 0.216250000  |
| C | 4.647361000  | 2.242391000  | -1.056036000 |
| H | 5.452080000  | 2.960148000  | -0.884188000 |
| H | 3.708105000  | 2.795519000  | -1.115125000 |
| H | 4.824699000  | 1.746416000  | -2.012160000 |
| C | 4.334985000  | 1.945765000  | 1.449982000  |
| H | 5.128139000  | 2.669938000  | 1.646156000  |
| H | 4.299074000  | 1.238559000  | 2.280886000  |
| H | 3.385505000  | 2.482550000  | 1.405647000  |
| C | 2.192797000  | 0.443305000  | -0.233895000 |
| C | 1.142833000  | -0.417462000 | -0.033906000 |
| H | 1.352046000  | -1.445142000 | 0.237455000  |
| C | -5.338867000 | -0.307636000 | 0.130414000  |
| C | -4.366897000 | 0.681763000  | -0.183386000 |
| C | -3.029143000 | 0.370603000  | -0.131994000 |
| C | -2.550385000 | -0.913734000 | 0.226148000  |
| C | -3.527212000 | -1.895503000 | 0.541680000  |
| C | -4.863808000 | -1.613649000 | 0.499465000  |
| H | -4.644284000 | 1.690485000  | -0.447841000 |
| C | -1.170157000 | -1.124686000 | 0.243046000  |
| H | -3.196490000 | -2.891065000 | 0.815149000  |
| H | -5.566410000 | -2.399112000 | 0.732205000  |
| C | -0.255087000 | -0.121513000 | -0.070674000 |
| C | -0.762832000 | 1.201399000  | -0.429246000 |
| H | -0.794314000 | -2.107025000 | 0.511642000  |
| H | 1.964941000  | 1.487694000  | -0.392941000 |
| O | -2.141161000 | 1.364628000  | -0.438161000 |
| O | -0.110489000 | 2.179610000  | -0.724220000 |
| N | -6.664073000 | -0.032335000 | 0.081362000  |
| C | -7.689801000 | -1.008210000 | 0.486341000  |
| H | -8.539189000 | -0.433731000 | 0.860121000  |
| H | -7.323219000 | -1.589100000 | 1.332714000  |
| C | -8.141259000 | -1.923993000 | -0.654147000 |
| H | -8.543405000 | -1.342942000 | -1.487574000 |
| H | -7.315374000 | -2.532374000 | -1.029078000 |
| H | -8.927107000 | -2.595237000 | -0.298432000 |
| C | -7.176762000 | 1.266338000  | -0.384203000 |
| H | -6.542851000 | 1.635241000  | -1.191263000 |

|   |             |             |             |
|---|-------------|-------------|-------------|
| H | -8.15527000 | 1.07792500  | -0.82952800 |
| C | -7.30370200 | 2.30602500  | 0.73260200  |
| H | -7.72033700 | 3.23164700  | 0.32746700  |
| H | -7.96952700 | 1.95193800  | 1.52330100  |
| H | -6.33379100 | 2.53480000  | 1.17945500  |
| H | 4.29662900  | -2.89791300 | -1.21336500 |

*Coordinates of the optimized geometry of ttt*

|   |             |             |             |
|---|-------------|-------------|-------------|
| N | 4.52259200  | 1.20011800  | -0.09979600 |
| C | 5.82127400  | 0.63175400  | -0.06709400 |
| C | 7.05457200  | 1.26807700  | -0.14259700 |
| H | 7.15084800  | 2.34068600  | -0.24399600 |
| C | 8.19148400  | 0.45904100  | -0.08429000 |
| H | 9.17031900  | 0.91983500  | -0.14073500 |
| C | 8.08465800  | -0.92769300 | 0.04408800  |
| H | 8.98235800  | -1.53270300 | 0.08689000  |
| C | 6.83058300  | -1.54405300 | 0.11654800  |
| H | 6.75746100  | -2.62105000 | 0.21412600  |
| C | 5.69528400  | -0.75034000 | 0.05893900  |
| C | 4.22410700  | -1.11831500 | 0.10889500  |
| C | 3.56999500  | 0.26354500  | -0.01472200 |
| C | 4.27440800  | 2.63877400  | -0.22646300 |
| H | 5.21825200  | 3.16933400  | -0.15459000 |
| H | 3.62112900  | 2.97564900  | 0.57783100  |
| C | 3.88569600  | -1.79005000 | 1.46342000  |
| H | 4.47859700  | -2.70076000 | 1.56647200  |
| H | 2.83245500  | -2.06393200 | 1.52888700  |
| H | 4.12427400  | -1.12951500 | 2.29922400  |
| C | 3.85878900  | -2.03380400 | -1.08556300 |
| H | 4.44539400  | -2.95243800 | -1.02376300 |
| H | 4.08368100  | -1.54717500 | -2.03663400 |
| H | 2.80353900  | -2.30691300 | -1.07859500 |
| C | 2.20158800  | 0.61456800  | -0.05248700 |
| C | 1.16141600  | -0.27770200 | 0.04260800  |
| H | 1.38823800  | -1.33030000 | 0.15925800  |
| C | -5.32085800 | -0.29208100 | 0.03634900  |
| C | -4.36017600 | 0.75005700  | -0.08309700 |
| C | -3.01889400 | 0.45380000  | -0.04976500 |
| C | -2.52506000 | -0.86577600 | 0.10266900  |
| C | -3.49093800 | -1.90107700 | 0.22205400  |
| C | -4.83064400 | -1.63527200 | 0.19185600  |
| H | -4.65002200 | 1.78482100  | -0.18225600 |
| C | -1.14336900 | -1.05748100 | 0.12627600  |
| H | -3.14741800 | -2.92323200 | 0.33289700  |
| H | -5.52455700 | -2.45809500 | 0.27046300  |
| C | -0.23800500 | -0.00234800 | 0.00960400  |
| C | -0.76218900 | 1.35474900  | -0.14223400 |
| H | -0.75756500 | -2.06553500 | 0.24076400  |
| H | 1.95785700  | 1.65982500  | -0.16741100 |
| O | -2.14253200 | 1.49735600  | -0.16254200 |
| O | -0.12179400 | 2.37769700  | -0.25364300 |
| N | -6.64887600 | -0.03217300 | 0.00270400  |
| C | -7.66367800 | -1.07686900 | 0.22088700  |
| H | -8.53211100 | -0.58315400 | 0.66028200  |
| H | -7.30359300 | -1.77934700 | 0.97282000  |

|   |              |              |              |
|---|--------------|--------------|--------------|
| C | -8.073168000 | -1.806168000 | -1.061329000 |
| H | -8.470661000 | -1.106859000 | -1.800811000 |
| H | -7.228428000 | -2.333641000 | -1.509736000 |
| H | -8.852114000 | -2.538447000 | -0.834230000 |
| C | -7.175411000 | 1.319857000  | -0.244761000 |
| H | -6.533477000 | 1.828941000  | -0.964420000 |
| H | -8.142874000 | 1.197144000  | -0.734719000 |
| C | -7.339396000 | 2.151942000  | 1.029944000  |
| H | -7.759424000 | 3.129155000  | 0.778724000  |
| H | -8.017626000 | 1.662317000  | 1.732921000  |
| H | -6.382772000 | 2.310201000  | 1.532384000  |
| H | 3.814442000  | 2.856332000  | -1.191346000 |

*Coordinates of the optimized geometry of **ctc***

|   |              |              |              |
|---|--------------|--------------|--------------|
| N | -4.289072000 | 0.915088000  | -0.223517000 |
| C | -5.655748000 | 0.543931000  | -0.080331000 |
| C | -6.776024000 | 1.365292000  | -0.070501000 |
| H | -6.708787000 | 2.441044000  | -0.163906000 |
| C | -8.017384000 | 0.742108000  | 0.080092000  |
| H | -8.914351000 | 1.349430000  | 0.095364000  |
| C | -8.116651000 | -0.644429000 | 0.215344000  |
| H | -9.091533000 | -1.102459000 | 0.332166000  |
| C | -6.971156000 | -1.448307000 | 0.206687000  |
| H | -7.057558000 | -2.523333000 | 0.314847000  |
| C | -5.733856000 | -0.839988000 | 0.060700000  |
| C | -4.336551000 | -1.417820000 | 0.017009000  |
| C | -3.489509000 | -0.150923000 | -0.131806000 |
| C | -3.889848000 | 2.294443000  | -0.499362000 |
| H | -3.046501000 | 2.296296000  | -1.187521000 |
| H | -3.621220000 | 2.812727000  | 0.422902000  |
| C | -4.146705000 | -2.341690000 | -1.212209000 |
| H | -4.826530000 | -3.191638000 | -1.127318000 |
| H | -3.126891000 | -2.728516000 | -1.260134000 |
| H | -4.367111000 | -1.814995000 | -2.142665000 |
| C | -3.982296000 | -2.168247000 | 1.321452000  |
| H | -4.644592000 | -3.028946000 | 1.433349000  |
| H | -4.103661000 | -1.523860000 | 2.194231000  |
| H | -2.953220000 | -2.531790000 | 1.295409000  |
| C | -2.077013000 | -0.206291000 | -0.159166000 |
| C | -1.185796000 | 0.820156000  | 0.037632000  |
| H | -1.549579000 | 1.814315000  | 0.255754000  |
| C | 5.205129000  | -0.365394000 | -0.077455000 |
| C | 4.421012000  | 0.792778000  | 0.185397000  |
| C | 3.050949000  | 0.722863000  | 0.125220000  |
| C | 2.353514000  | -0.470483000 | -0.193534000 |
| C | 3.144523000  | -1.621093000 | -0.459742000 |
| C | 4.508750000  | -1.579915000 | -0.406956000 |
| H | 4.870865000  | 1.745512000  | 0.418639000  |
| C | 0.958685000  | -0.441997000 | -0.223042000 |
| H | 2.644014000  | -2.551371000 | -0.702726000 |
| H | 5.062937000  | -2.485136000 | -0.601629000 |
| C | 0.238303000  | 0.718876000  | 0.044814000  |
| C | 0.970232000  | 1.947638000  | 0.358103000  |
| H | 0.433561000  | -1.359068000 | -0.465935000 |
| H | -1.689535000 | -1.210733000 | -0.279134000 |

|   |              |              |              |
|---|--------------|--------------|--------------|
| O | 2.353505000  | 1.871647000  | 0.381162000  |
| O | 0.485644000  | 3.031905000  | 0.600567000  |
| N | 6.556166000  | -0.327798000 | -0.016998000 |
| C | 7.395528000  | -1.490442000 | -0.354367000 |
| H | 8.340873000  | -1.095733000 | -0.730567000 |
| H | 6.944003000  | -2.034864000 | -1.183700000 |
| C | 7.654291000  | -2.417415000 | 0.836121000  |
| H | 8.136887000  | -1.878714000 | 1.655183000  |
| H | 6.726485000  | -2.852870000 | 1.213624000  |
| H | 8.315208000  | -3.232257000 | 0.530077000  |
| C | 7.287304000  | 0.880350000  | 0.399319000  |
| H | 6.728790000  | 1.384638000  | 1.188605000  |
| H | 8.219404000  | 0.542986000  | 0.855444000  |
| C | 7.590147000  | 1.836596000  | -0.757358000 |
| H | 8.157025000  | 2.693557000  | -0.384994000 |
| H | 8.188095000  | 1.343394000  | -1.527549000 |
| H | 6.674356000  | 2.208624000  | -1.221649000 |
| H | -4.723259000 | 2.810732000  | -0.968770000 |

*Coordinates of the optimized geometry of ttc*

|   |              |              |              |
|---|--------------|--------------|--------------|
| N | 4.266975000  | 1.381746000  | -0.184218000 |
| C | 5.640106000  | 1.036121000  | -0.110069000 |
| C | 6.753519000  | 1.864597000  | -0.186872000 |
| H | 6.674654000  | 2.935694000  | -0.316420000 |
| C | 8.006435000  | 1.256012000  | -0.084747000 |
| H | 8.897220000  | 1.870107000  | -0.139647000 |
| C | 8.126033000  | -0.124905000 | 0.087752000  |
| H | 9.109789000  | -0.572192000 | 0.164572000  |
| C | 6.988899000  | -0.936611000 | 0.163793000  |
| H | 7.091293000  | -2.007154000 | 0.298620000  |
| C | 5.740021000  | -0.342806000 | 0.064449000  |
| C | 4.348927000  | -0.946763000 | 0.110579000  |
| C | 3.478858000  | 0.306577000  | -0.051973000 |
| C | 3.791606000  | 2.754748000  | -0.371459000 |
| H | 4.638268000  | 3.394628000  | -0.597696000 |
| H | 3.306091000  | 3.113462000  | 0.537270000  |
| C | 4.107684000  | -1.640623000 | 1.473344000  |
| H | 4.834425000  | -2.445739000 | 1.597465000  |
| H | 3.109902000  | -2.075252000 | 1.534834000  |
| H | 4.231102000  | -0.937486000 | 2.299216000  |
| C | 4.154906000  | -1.931904000 | -1.069581000 |
| H | 4.890996000  | -2.733811000 | -0.987423000 |
| H | 4.300709000  | -1.429833000 | -2.027960000 |
| H | 3.162199000  | -2.382326000 | -1.062337000 |
| C | 2.072343000  | 0.420649000  | -0.064163000 |
| C | 1.198966000  | -0.634573000 | 0.038390000  |
| H | 1.589687000  | -1.638782000 | 0.128639000  |
| C | -5.217244000 | 0.394714000  | -0.030830000 |
| C | -4.405641000 | -0.771269000 | 0.058048000  |
| C | -3.037482000 | -0.658050000 | 0.049462000  |
| C | -2.367971000 | 0.589094000  | -0.049057000 |
| C | -3.186307000 | 1.748337000  | -0.137707000 |
| C | -4.549303000 | 1.664968000  | -0.129492000 |
| H | -4.832530000 | -1.760681000 | 0.116783000  |
| C | -0.973277000 | 0.600650000  | -0.052823000 |



|   |              |              |              |
|---|--------------|--------------|--------------|
| H | -2.707641000 | 2.718393000  | -0.207056000 |
| H | -5.124670000 | 2.576361000  | -0.182085000 |
| C | -0.224982000 | -0.571135000 | 0.036158000  |
| C | -0.928091000 | -1.852025000 | 0.137685000  |
| H | -0.469854000 | 1.558311000  | -0.126820000 |
| H | 1.673468000  | 1.422076000  | -0.160076000 |
| O | -2.312955000 | -1.815186000 | 0.135110000  |
| O | -0.417972000 | -2.947978000 | 0.223348000  |
| N | -6.567234000 | 0.313278000  | -0.020164000 |
| C | -7.432638000 | 1.492795000  | -0.194085000 |
| H | -8.349206000 | 1.141557000  | -0.671160000 |
| H | -6.969420000 | 2.180992000  | -0.900987000 |
| C | -7.766543000 | 2.198168000  | 1.122514000  |
| H | -8.267260000 | 1.518020000  | 1.815702000  |
| H | -6.867737000 | 2.582042000  | 1.609860000  |
| H | -8.437091000 | 3.039160000  | 0.928781000  |
| C | -7.273900000 | -0.964933000 | 0.167286000  |
| H | -6.717629000 | -1.583788000 | 0.871851000  |
| H | -8.223259000 | -0.731605000 | 0.652285000  |
| C | -7.527313000 | -1.715264000 | -1.142865000 |
| H | -8.081440000 | -2.634616000 | -0.937755000 |
| H | -8.119049000 | -1.109301000 | -1.833113000 |
| H | -6.591893000 | -1.983200000 | -1.638697000 |
| H | 3.092446000  | 2.795694000  | -1.206068000 |

*Coordinates of the optimized geometry of cct*

|   |              |              |              |
|---|--------------|--------------|--------------|
| N | 3.122654000  | -0.062172000 | -0.973045000 |
| C | 4.063059000  | 0.994291000  | -0.805690000 |
| C | 4.123949000  | 2.203427000  | -1.484299000 |
| H | 3.406169000  | 2.476283000  | -2.246766000 |
| C | 5.159703000  | 3.071157000  | -1.129679000 |
| H | 5.243521000  | 4.027907000  | -1.630809000 |
| C | 6.083065000  | 2.724003000  | -0.140058000 |
| H | 6.876307000  | 3.416286000  | 0.115771000  |
| C | 5.996956000  | 1.496600000  | 0.526647000  |
| H | 6.719435000  | 1.238668000  | 1.292102000  |
| C | 4.969843000  | 0.628893000  | 0.186260000  |
| C | 4.602530000  | -0.745950000 | 0.702282000  |
| C | 3.349170000  | -1.044147000 | -0.118507000 |
| C | 2.118217000  | -0.036081000 | -2.034301000 |
| H | 1.734983000  | -1.040027000 | -2.189858000 |
| H | 2.592772000  | 0.318122000  | -2.948679000 |
| C | 4.270393000  | -0.739559000 | 2.212277000  |
| H | 5.163424000  | -0.462613000 | 2.775880000  |
| H | 3.951736000  | -1.732241000 | 2.536472000  |
| H | 3.475995000  | -0.027176000 | 2.436879000  |
| C | 5.713324000  | -1.782205000 | 0.395906000  |
| H | 6.623785000  | -1.491256000 | 0.922967000  |
| H | 5.933078000  | -1.829053000 | -0.672314000 |
| H | 5.425786000  | -2.776394000 | 0.743416000  |
| C | 2.622606000  | -2.273376000 | -0.015079000 |
| C | 1.287318000  | -2.551413000 | -0.045863000 |
| H | 1.061445000  | -3.614342000 | -0.080010000 |
| C | -4.679513000 | 0.016870000  | 0.023710000  |
| C | -3.408146000 | 0.531468000  | 0.394238000  |

|   |              |              |              |
|---|--------------|--------------|--------------|
| C | -2.287658000 | -0.259208000 | 0.280878000  |
| C | -2.329888000 | -1.591422000 | -0.192579000 |
| C | -3.604088000 | -2.101570000 | -0.552359000 |
| C | -4.734363000 | -1.337378000 | -0.453446000 |
| H | -3.288336000 | 1.529175000  | 0.787783000  |
| C | -1.126690000 | -2.301208000 | -0.281435000 |
| H | -3.673352000 | -3.117667000 | -0.923709000 |
| H | -5.676916000 | -1.765428000 | -0.758751000 |
| C | 0.101577000  | -1.735162000 | 0.041749000  |
| C | 0.120871000  | -0.384192000 | 0.586754000  |
| H | -1.152737000 | -3.328047000 | -0.632907000 |
| H | 3.269718000  | -3.131334000 | 0.141699000  |
| O | -1.093552000 | 0.283483000  | 0.667083000  |
| O | 1.086930000  | 0.217313000  | 1.008991000  |
| N | -5.801241000 | 0.774044000  | 0.115583000  |
| C | -7.140365000 | 0.239233000  | -0.179750000 |
| H | -7.846130000 | 0.799674000  | 0.435980000  |
| H | -7.201260000 | -0.795152000 | 0.159464000  |
| C | -7.530661000 | 0.355772000  | -1.655549000 |
| H | -7.509252000 | 1.397380000  | -1.985231000 |
| H | -6.855920000 | -0.218515000 | -2.294298000 |
| H | -8.545137000 | -0.024709000 | -1.800097000 |
| C | -5.757619000 | 2.189436000  | 0.513403000  |
| H | -4.856518000 | 2.650429000  | 0.106855000  |
| H | -6.597947000 | 2.682778000  | 0.021517000  |
| C | -5.844768000 | 2.399959000  | 2.027544000  |
| H | -5.832212000 | 3.469588000  | 2.252315000  |
| H | -6.770699000 | 1.980260000  | 2.428360000  |
| H | -5.005267000 | 1.931894000  | 2.546218000  |
| H | 1.303700000  | 0.636602000  | -1.764932000 |

*Coordinates of the optimized geometry of tct*

|   |              |              |              |
|---|--------------|--------------|--------------|
| N | -3.127002000 | 0.030017000  | -0.936864000 |
| C | -4.077718000 | 1.050167000  | -0.646647000 |
| C | -4.152957000 | 2.329137000  | -1.180449000 |
| H | -3.438792000 | 2.697131000  | -1.905489000 |
| C | -5.198295000 | 3.138190000  | -0.728453000 |
| H | -5.292923000 | 4.145781000  | -1.114803000 |
| C | -6.117333000 | 2.667716000  | 0.212949000  |
| H | -6.918627000 | 3.316206000  | 0.546649000  |
| C | -6.016616000 | 1.372434000  | 0.732920000  |
| H | -6.736815000 | 1.018946000  | 1.461549000  |
| C | -4.979584000 | 0.561946000  | 0.295725000  |
| C | -4.598211000 | -0.860481000 | 0.646800000  |
| C | -3.342549000 | -1.047544000 | -0.202971000 |
| C | -2.128843000 | 0.187803000  | -1.992667000 |
| H | -1.318561000 | 0.832583000  | -1.652219000 |
| H | -2.612286000 | 0.640681000  | -2.857468000 |
| C | -5.699132000 | -1.862993000 | 0.217148000  |
| H | -6.610891000 | -1.648916000 | 0.777731000  |
| H | -5.400758000 | -2.889380000 | 0.438547000  |
| H | -5.921654000 | -1.780377000 | -0.848419000 |
| C | -4.265862000 | -1.029671000 | 2.147136000  |
| H | -5.159457000 | -0.825113000 | 2.740239000  |
| H | -3.474901000 | -0.344223000 | 2.453188000  |

|   |              |              |              |
|---|--------------|--------------|--------------|
| H | -3.941961000 | -2.051785000 | 2.353507000  |
| C | -2.605224000 | -2.273565000 | -0.243442000 |
| C | -1.268198000 | -2.536674000 | -0.313508000 |
| H | -1.036403000 | -3.587378000 | -0.469181000 |
| C | 4.682248000  | 0.052756000  | -0.024723000 |
| C | 3.412996000  | 0.511531000  | 0.419046000  |
| C | 2.296367000  | -0.270838000 | 0.233427000  |
| C | 2.340458000  | -1.539272000 | -0.391406000 |
| C | 3.612056000  | -1.993269000 | -0.827419000 |
| C | 4.738674000  | -1.236321000 | -0.657396000 |
| H | 3.286841000  | 1.472514000  | 0.893581000  |
| C | 1.141246000  | -2.244793000 | -0.542701000 |
| H | 3.684089000  | -2.964652000 | -1.303281000 |
| H | 5.684387000  | -1.633404000 | -0.993512000 |
| C | -0.086571000 | -1.727825000 | -0.144266000 |
| C | -0.108365000 | -0.445365000 | 0.546615000  |
| H | 1.169291000  | -3.225972000 | -1.006470000 |
| H | -3.244446000 | -3.149236000 | -0.181249000 |
| O | 1.102867000  | 0.218802000  | 0.686452000  |
| O | -1.072881000 | 0.098220000  | 1.044067000  |
| N | 5.801531000  | 0.799748000  | 0.146578000  |
| C | 7.112100000  | 0.390690000  | -0.383954000 |
| H | 7.665793000  | 1.307410000  | -0.595408000 |
| H | 6.974564000  | -0.106160000 | -1.344658000 |
| C | 7.912720000  | -0.489727000 | 0.579043000  |
| H | 8.088175000  | 0.025080000  | 1.526768000  |
| H | 7.392511000  | -1.426369000 | 0.790869000  |
| H | 8.884047000  | -0.729446000 | 0.138775000  |
| C | 5.783682000  | 2.075669000  | 0.878367000  |
| H | 5.084366000  | 2.001755000  | 1.712275000  |
| H | 6.772815000  | 2.199276000  | 1.322977000  |
| C | 5.456902000  | 3.282314000  | -0.005700000 |
| H | 5.487281000  | 4.196557000  | 0.592585000  |
| H | 6.184442000  | 3.382502000  | -0.814850000 |
| H | 4.462665000  | 3.197296000  | -0.449482000 |
| H | -1.738328000 | -0.787926000 | -2.265761000 |

*Coordinates of the optimized geometry of ccc*

|   |              |              |              |
|---|--------------|--------------|--------------|
| N | -2.940695000 | 0.097531000  | -0.882344000 |
| C | -3.702538000 | -1.106304000 | -0.854406000 |
| C | -3.599850000 | -2.205414000 | -1.696215000 |
| H | -2.874002000 | -2.256045000 | -2.497228000 |
| C | -4.479643000 | -3.263692000 | -1.457911000 |
| H | -4.432645000 | -4.143031000 | -2.088750000 |
| C | -5.413550000 | -3.204277000 | -0.420179000 |
| H | -6.084107000 | -4.039514000 | -0.257303000 |
| C | -5.494050000 | -2.082740000 | 0.412570000  |
| H | -6.223986000 | -2.048025000 | 1.212871000  |
| C | -4.622249000 | -1.027577000 | 0.188685000  |
| C | -4.457241000 | 0.303578000  | 0.889962000  |
| C | -3.288669000 | 0.908515000  | 0.110528000  |
| C | -2.010967000 | 0.398116000  | -1.968643000 |
| H | -1.890794000 | 1.475110000  | -2.048197000 |
| H | -2.428563000 | 0.008233000  | -2.895214000 |
| C | -4.094710000 | 0.143895000  | 2.384016000  |

|   |              |              |              |
|---|--------------|--------------|--------------|
| H | -4.928490000 | -0.325418000 | 2.909779000  |
| H | -3.905776000 | 1.118057000  | 2.839085000  |
| H | -3.210284000 | -0.482008000 | 2.515043000  |
| C | -5.723702000 | 1.183951000  | 0.732470000  |
| H | -6.565456000 | 0.679327000  | 1.209929000  |
| H | -5.969210000 | 1.346937000  | -0.318512000 |
| H | -5.589745000 | 2.151496000  | 1.219858000  |
| C | -2.762961000 | 2.203477000  | 0.393312000  |
| C | -1.501235000 | 2.727525000  | 0.303513000  |
| H | -1.448564000 | 3.803952000  | 0.437377000  |
| C | 4.107397000  | -0.579424000 | 0.201575000  |
| C | 3.744743000  | 0.759183000  | -0.110957000 |
| C | 2.434191000  | 1.159842000  | -0.000954000 |
| C | 1.395954000  | 0.292166000  | 0.414325000  |
| C | 1.767470000  | -1.038627000 | 0.737708000  |
| C | 3.063185000  | -1.465239000 | 0.636519000  |
| H | 4.469562000  | 1.482801000  | -0.451034000 |
| C | 0.090319000  | 0.795573000  | 0.482553000  |
| H | 1.000240000  | -1.727356000 | 1.073057000  |
| H | 3.295176000  | -2.483995000 | 0.907089000  |
| C | -0.211307000 | 2.110743000  | 0.159561000  |
| C | 0.878023000  | 3.005765000  | -0.235225000 |
| H | -0.691771000 | 0.135958000  | 0.841226000  |
| H | -3.513120000 | 2.881881000  | 0.787709000  |
| O | 2.149433000  | 2.462919000  | -0.309656000 |
| O | 0.774015000  | 4.180827000  | -0.515804000 |
| N | 5.390766000  | -1.003811000 | 0.099095000  |
| C | 5.778976000  | -2.405138000 | 0.328358000  |
| H | 6.649245000  | -2.597235000 | -0.301921000 |
| H | 4.990649000  | -3.063435000 | -0.037330000 |
| C | 6.115920000  | -2.713510000 | 1.789474000  |
| H | 6.934912000  | -2.083499000 | 2.144889000  |
| H | 5.254230000  | -2.552978000 | 2.441157000  |
| H | 6.426274000  | -3.757369000 | 1.883213000  |
| C | 6.489110000  | -0.091958000 | -0.257385000 |
| H | 6.311250000  | 0.882254000  | 0.199733000  |
| H | 7.392154000  | -0.486063000 | 0.212038000  |
| C | 6.703817000  | 0.042323000  | -1.767577000 |
| H | 7.547821000  | 0.709193000  | -1.961264000 |
| H | 6.927443000  | -0.927527000 | -2.218634000 |
| H | 5.822168000  | 0.454573000  | -2.263024000 |
| H | -1.041287000 | -0.066808000 | -1.783273000 |

*Coordinates of the optimized geometry of tcc*

|   |              |              |              |
|---|--------------|--------------|--------------|
| N | -2.953039000 | -0.032604000 | -0.877865000 |
| C | -3.722216000 | 1.156872000  | -0.721860000 |
| C | -3.633772000 | 2.336933000  | -1.447527000 |
| H | -2.916670000 | 2.473736000  | -2.246200000 |
| C | -4.515367000 | 3.360565000  | -1.092921000 |
| H | -4.478459000 | 4.300234000  | -1.630536000 |
| C | -5.437711000 | 3.190426000  | -0.057159000 |
| H | -6.109625000 | 4.001171000  | 0.197789000  |
| C | -5.504372000 | 1.988809000  | 0.656679000  |
| H | -6.224558000 | 1.868115000  | 1.457335000  |
| C | -4.630539000 | 0.966985000  | 0.316787000  |

|   |              |              |              |
|---|--------------|--------------|--------------|
| C | -4.450664000 | -0.426694000 | 0.879212000  |
| C | -3.284858000 | -0.941182000 | 0.032992000  |
| C | -2.033393000 | -0.216523000 | -1.998404000 |
| H | -1.063885000 | 0.233509000  | -1.778361000 |
| H | -2.462793000 | 0.262011000  | -2.876780000 |
| C | -5.712361000 | -1.296338000 | 0.642551000  |
| H | -6.552919000 | -0.852266000 | 1.178806000  |
| H | -5.566929000 | -2.309012000 | 1.023053000  |
| H | -5.967933000 | -1.349608000 | -0.417246000 |
| C | -4.078180000 | -0.412410000 | 2.379271000  |
| H | -4.912271000 | -0.004247000 | 2.953464000  |
| H | -3.198617000 | 0.206478000  | 2.565607000  |
| H | -3.878246000 | -1.424394000 | 2.736812000  |
| C | -2.744584000 | -2.251975000 | 0.181901000  |
| C | -1.478886000 | -2.752697000 | 0.030922000  |
| H | -1.416251000 | -3.836467000 | 0.059563000  |
| C | 4.106767000  | 0.587265000  | 0.232985000  |
| C | 3.752348000  | -0.718086000 | -0.204981000 |
| C | 2.443138000  | -1.132893000 | -0.141633000 |
| C | 1.399009000  | -0.313761000 | 0.350319000  |
| C | 1.761900000  | 0.983218000  | 0.797001000  |
| C | 3.055435000  | 1.424429000  | 0.741397000  |
| H | 4.487737000  | -1.417220000 | -0.572418000 |
| C | 0.097228000  | -0.830288000 | 0.373723000  |
| H | 0.987209000  | 1.638412000  | 1.179051000  |
| H | 3.274704000  | 2.427523000  | 1.073841000  |
| C | -0.194952000 | -2.114863000 | -0.061853000 |
| C | 0.901157000  | -2.963712000 | -0.533406000 |
| H | -0.688340000 | -0.210399000 | 0.790661000  |
| H | -3.483999000 | -2.973798000 | 0.514761000  |
| O | 2.168380000  | -2.406789000 | -0.561138000 |
| O | 0.805866000  | -4.110728000 | -0.914888000 |
| N | 5.387658000  | 1.026741000  | 0.174543000  |
| C | 5.796423000  | 2.338371000  | 0.703379000  |
| H | 6.836296000  | 2.239634000  | 1.019807000  |
| H | 5.226779000  | 2.559386000  | 1.606414000  |
| C | 5.668184000  | 3.472350000  | -0.316933000 |
| H | 6.271715000  | 3.270637000  | -1.205221000 |
| H | 4.631779000  | 3.610943000  | -0.632429000 |
| H | 6.019066000  | 4.407913000  | 0.126137000  |
| C | 6.464896000  | 0.220028000  | -0.420478000 |
| H | 6.069920000  | -0.336632000 | -1.271059000 |
| H | 7.195563000  | 0.920092000  | -0.829941000 |
| C | 7.145559000  | -0.718054000 | 0.580004000  |
| H | 7.949939000  | -1.266020000 | 0.082668000  |
| H | 7.580802000  | -0.156054000 | 1.409817000  |
| H | 6.440935000  | -1.443897000 | 0.991667000  |
| H | -1.908394000 | -1.279264000 | -2.187418000 |

*Coordinates of the transition state for **ttc** → **ttt***

|   |              |             |              |
|---|--------------|-------------|--------------|
| N | -4.307727000 | 0.836248000 | -0.968939000 |
| C | -5.673006000 | 0.478171000 | -0.784040000 |
| C | -6.787285000 | 0.965827000 | -1.454880000 |
| H | -6.716294000 | 1.710540000 | -2.236272000 |
| C | -8.023242000 | 0.441893000 | -1.074640000 |

|   |              |              |              |
|---|--------------|--------------|--------------|
| H | -8.921041000 | 0.790440000  | -1.570078000 |
| C | -8.117844000 | -0.523474000 | -0.067313000 |
| H | -9.090841000 | -0.912414000 | 0.207777000  |
| C | -6.977382000 | -0.995832000 | 0.589304000  |
| H | -7.065411000 | -1.744288000 | 1.367752000  |
| C | -5.742964000 | -0.483617000 | 0.217470000  |
| C | -4.345668000 | -0.778705000 | 0.721200000  |
| C | -3.512328000 | 0.155013000  | -0.161004000 |
| C | -3.938281000 | 1.845904000  | -1.968636000 |
| H | -4.566587000 | 2.722638000  | -1.818675000 |
| H | -4.107620000 | 1.437799000  | -2.965386000 |
| C | -3.983156000 | -2.265311000 | 0.474012000  |
| H | -4.686437000 | -2.894000000 | 1.022459000  |
| H | -2.977201000 | -2.498543000 | 0.821769000  |
| H | -4.052790000 | -2.516785000 | -0.585754000 |
| C | -4.225576000 | -0.403046000 | 2.221263000  |
| H | -4.940936000 | -1.000590000 | 2.788804000  |
| H | -4.454791000 | 0.651632000  | 2.383509000  |
| H | -3.229013000 | -0.607001000 | 2.611223000  |
| C | -2.080540000 | 0.309639000  | -0.188815000 |
| C | -1.212696000 | -0.313040000 | 0.630099000  |
| H | -1.560858000 | -0.988446000 | 1.403352000  |
| C | 5.269441000  | -0.241657000 | -0.258521000 |
| C | 4.372499000  | 0.593162000  | 0.453224000  |
| C | 3.020478000  | 0.310502000  | 0.455478000  |
| C | 2.465077000  | -0.787117000 | -0.228745000 |
| C | 3.362574000  | -1.613756000 | -0.938408000 |
| C | 4.712687000  | -1.359669000 | -0.957687000 |
| H | 4.707959000  | 1.467922000  | 0.989637000  |
| C | 1.061126000  | -0.979763000 | -0.160583000 |
| H | 2.972726000  | -2.472569000 | -1.473626000 |
| H | 5.356311000  | -2.034355000 | -1.501593000 |
| C | 0.255174000  | -0.120829000 | 0.533468000  |
| C | 0.831830000  | 1.003443000  | 1.245519000  |
| H | 0.625546000  | -1.827457000 | -0.679907000 |
| H | -1.671390000 | 0.973557000  | -0.939102000 |
| O | 2.204772000  | 1.159857000  | 1.160819000  |
| O | 0.226451000  | 1.820816000  | 1.913957000  |
| N | 6.611284000  | 0.007570000  | -0.276230000 |
| C | 7.544556000  | -0.781925000 | -1.090506000 |
| H | 8.369122000  | -0.119159000 | -1.361910000 |
| H | 7.062913000  | -1.059196000 | -2.029444000 |
| C | 8.091885000  | -2.020134000 | -0.374092000 |
| H | 8.610886000  | -1.741098000 | 0.546434000  |
| H | 7.292932000  | -2.718832000 | -0.115512000 |
| H | 8.804343000  | -2.539705000 | -1.020578000 |
| C | 7.210938000  | 1.083338000  | 0.522556000  |
| H | 6.687385000  | 1.158434000  | 1.477553000  |
| H | 8.230208000  | 0.773396000  | 0.762556000  |
| C | 7.237723000  | 2.439022000  | -0.190184000 |
| H | 7.716694000  | 3.185763000  | 0.448870000  |
| H | 7.803913000  | 2.378490000  | -1.123138000 |
| H | 6.229877000  | 2.787835000  | -0.425848000 |
| H | -2.900403000 | 2.135651000  | -1.860121000 |

*Coordinates of the transition state for ttt → ctt*

|   |              |              |              |
|---|--------------|--------------|--------------|
| N | 4.359347000  | -0.710167000 | -0.883042000 |
| C | 5.712576000  | -0.268342000 | -0.728276000 |
| C | 6.793701000  | -0.513273000 | -1.560990000 |
| H | 6.708482000  | -1.100352000 | -2.465827000 |
| C | 8.015783000  | 0.039977000  | -1.172867000 |
| H | 8.891077000  | -0.123328000 | -1.789476000 |
| C | 8.123049000  | 0.798660000  | -0.003875000 |
| H | 9.084040000  | 1.215406000  | 0.273070000  |
| C | 7.012271000  | 1.030167000  | 0.814262000  |
| H | 7.111616000  | 1.621736000  | 1.716573000  |
| C | 5.792631000  | 0.484298000  | 0.440207000  |
| C | 4.421969000  | 0.539539000  | 1.079267000  |
| C | 3.603869000  | -0.283331000 | 0.094554000  |
| C | 3.936503000  | -1.549175000 | -2.010112000 |
| H | 4.142133000  | -1.019945000 | -2.940253000 |
| H | 2.873200000  | -1.749400000 | -1.922564000 |
| C | 3.869477000  | 1.983264000  | 1.165682000  |
| H | 4.502686000  | 2.560173000  | 1.841825000  |
| H | 2.853440000  | 1.982135000  | 1.562887000  |
| H | 3.871836000  | 2.474023000  | 0.190489000  |
| C | 4.387881000  | -0.134973000 | 2.473666000  |
| H | 5.015281000  | 0.437541000  | 3.158848000  |
| H | 4.764912000  | -1.158420000 | 2.432273000  |
| H | 3.369145000  | -0.147189000 | 2.865152000  |
| C | 2.187360000  | -0.622146000 | 0.251325000  |
| C | 1.191281000  | 0.159931000  | -0.204819000 |
| H | 1.453578000  | 1.066706000  | -0.744027000 |
| C | -5.320116000 | 0.295651000  | -0.198681000 |
| C | -4.375778000 | -0.625912000 | 0.321321000  |
| C | -3.025661000 | -0.390765000 | 0.164484000  |
| C | -2.514768000 | 0.740170000  | -0.505616000 |
| C | -3.462144000 | 1.655103000  | -1.023172000 |
| C | -4.810502000 | 1.450325000  | -0.879092000 |
| H | -4.677660000 | -1.528618000 | 0.830445000  |
| C | -1.116175000 | 0.877383000  | -0.605921000 |
| H | -3.107052000 | 2.541452000  | -1.536996000 |
| H | -5.490574000 | 2.189426000  | -1.274717000 |
| C | -0.240827000 | -0.048397000 | -0.075775000 |
| C | -0.781396000 | -1.213962000 | 0.607777000  |
| H | -0.715147000 | 1.746787000  | -1.118133000 |
| H | 1.975008000  | -1.535824000 | 0.797717000  |
| O | -2.162517000 | -1.317372000 | 0.686171000  |
| O | -0.149689000 | -2.116512000 | 1.122685000  |
| N | -6.659651000 | 0.096124000  | -0.055916000 |
| C | -7.655753000 | 0.987875000  | -0.666860000 |
| H | -8.542411000 | 0.383006000  | -0.866903000 |
| H | -7.295194000 | 1.321831000  | -1.640836000 |
| C | -8.032355000 | 2.182542000  | 0.214071000  |
| H | -8.435340000 | 1.849225000  | 1.173716000  |
| H | -7.169179000 | 2.822294000  | 0.410750000  |
| H | -8.797379000 | 2.784087000  | -0.284041000 |
| C | -7.200279000 | -1.028646000 | 0.719089000  |
| H | -6.558949000 | -1.212862000 | 1.582544000  |

|   |              |              |              |
|---|--------------|--------------|--------------|
| H | -8.162265000 | -0.705626000 | 1.122118000  |
| C | -7.386918000 | -2.306879000 | -0.103946000 |
| H | -7.813074000 | -3.093666000 | 0.524155000  |
| H | -8.068118000 | -2.135921000 | -0.941341000 |
| H | -6.437387000 | -2.667570000 | -0.505588000 |
| H | 4.499012000  | -2.482221000 | -1.984223000 |

*Coordinates of the transition state for **ctt** → **ctc***

|   |              |              |              |
|---|--------------|--------------|--------------|
| N | 4.305895000  | 0.805551000  | -0.534056000 |
| C | 5.668347000  | 0.380411000  | -0.452914000 |
| C | 6.773759000  | 0.917533000  | -1.097442000 |
| H | 6.701374000  | 1.759254000  | -1.773118000 |
| C | 8.003336000  | 0.308131000  | -0.841025000 |
| H | 8.894200000  | 0.690781000  | -1.323677000 |
| C | 8.099109000  | -0.785823000 | 0.023836000  |
| H | 9.066534000  | -1.238944000 | 0.204018000  |
| C | 6.966322000  | -1.306472000 | 0.657774000  |
| H | 7.053522000  | -2.155863000 | 1.324769000  |
| C | 5.738933000  | -0.710499000 | 0.408915000  |
| C | 4.350056000  | -1.021376000 | 0.919466000  |
| C | 3.526637000  | 0.032632000  | 0.191895000  |
| C | 3.923782000  | 1.997507000  | -1.300032000 |
| H | 2.986297000  | 2.389130000  | -0.916056000 |
| H | 3.821578000  | 1.743913000  | -2.355532000 |
| C | 4.244482000  | -0.819986000 | 2.453350000  |
| H | 4.912985000  | -1.528259000 | 2.945557000  |
| H | 3.229307000  | -1.013024000 | 2.804118000  |
| H | 4.535863000  | 0.190577000  | 2.744679000  |
| C | 3.882168000  | -2.442713000 | 0.522463000  |
| H | 4.529657000  | -3.177432000 | 1.004091000  |
| H | 3.934326000  | -2.591035000 | -0.557696000 |
| H | 2.857255000  | -2.619326000 | 0.853435000  |
| C | 2.090076000  | 0.122331000  | 0.325466000  |
| C | 1.222740000  | 0.472851000  | -0.639208000 |
| H | 1.578758000  | 0.734981000  | -1.631438000 |
| C | -5.250903000 | -0.337073000 | -0.116468000 |
| C | -4.371258000 | 0.730062000  | 0.191256000  |
| C | -3.016871000 | 0.598773000  | -0.045410000 |
| C | -2.441901000 | -0.565451000 | -0.588713000 |
| C | -3.322593000 | -1.626028000 | -0.892613000 |
| C | -4.674803000 | -1.525089000 | -0.669614000 |
| H | -4.721062000 | 1.652334000  | 0.629533000  |
| C | -1.036330000 | -0.591869000 | -0.782078000 |
| H | -2.917710000 | -2.537595000 | -1.318132000 |
| H | -5.305165000 | -2.360108000 | -0.936307000 |
| C | -0.247633000 | 0.470483000  | -0.438337000 |
| C | -0.845327000 | 1.672532000  | 0.111245000  |
| H | -0.585008000 | -1.483320000 | -1.205977000 |
| H | 1.701706000  | -0.218076000 | 1.279575000  |
| O | -2.219137000 | 1.666926000  | 0.281339000  |
| O | -0.257247000 | 2.688649000  | 0.432636000  |
| N | -6.594356000 | -0.237379000 | 0.103635000  |
| C | -7.508835000 | -1.367939000 | -0.103060000 |
| H | -8.334640000 | -1.241760000 | 0.600363000  |
| H | -7.010854000 | -2.295226000 | 0.184324000  |



|   |              |              |              |
|---|--------------|--------------|--------------|
| C | -8.056760000 | -1.464358000 | -1.530065000 |
| H | -8.595120000 | -0.553418000 | -1.803806000 |
| H | -7.255566000 | -1.617550000 | -2.256560000 |
| H | -8.752260000 | -2.304619000 | -1.605937000 |
| C | -7.214295000 | 1.008705000  | 0.570623000  |
| H | -6.702589000 | 1.859042000  | 0.116298000  |
| H | -8.232891000 | 1.026530000  | 0.177009000  |
| C | -7.248415000 | 1.146895000  | 2.095978000  |
| H | -7.743172000 | 2.081519000  | 2.373665000  |
| H | -7.803589000 | 0.322249000  | 2.550163000  |
| H | -6.242237000 | 1.154334000  | 2.520991000  |
| H | 4.705877000  | 2.744078000  | -1.178943000 |

*Coordinates of the transition state for **ttc** → **tcc***

|   |              |              |              |
|---|--------------|--------------|--------------|
| N | 3.525109000  | 0.371569000  | -0.868837000 |
| C | 4.551427000  | -0.578352000 | -0.945732000 |
| C | 5.039674000  | -1.241322000 | -2.069518000 |
| H | 4.622253000  | -1.079926000 | -3.055454000 |
| C | 6.096034000  | -2.142691000 | -1.887092000 |
| H | 6.491415000  | -2.670361000 | -2.747892000 |
| C | 6.639876000  | -2.374402000 | -0.624586000 |
| H | 7.455960000  | -3.077481000 | -0.506364000 |
| C | 6.128455000  | -1.700745000 | 0.495439000  |
| H | 6.551017000  | -1.882698000 | 1.477961000  |
| C | 5.083850000  | -0.807970000 | 0.328671000  |
| C | 4.348802000  | 0.056008000  | 1.340960000  |
| C | 3.286149000  | 0.735627000  | 0.448845000  |
| C | 2.799545000  | 0.846835000  | -2.033651000 |
| H | 1.927769000  | 0.224040000  | -2.259587000 |
| H | 3.465249000  | 0.845676000  | -2.897177000 |
| C | 5.293908000  | 1.112409000  | 1.955577000  |
| H | 6.090110000  | 0.620674000  | 2.520625000  |
| H | 4.746398000  | 1.768807000  | 2.636990000  |
| H | 5.754008000  | 1.728026000  | 1.179290000  |
| C | 3.702613000  | -0.793329000 | 2.452544000  |
| H | 4.474979000  | -1.319082000 | 3.019833000  |
| H | 3.018866000  | -1.535423000 | 2.034673000  |
| H | 3.144391000  | -0.163259000 | 3.149616000  |
| C | 2.313343000  | 1.532409000  | 0.939496000  |
| C | 1.229323000  | 2.248034000  | 0.253032000  |
| H | 1.410086000  | 3.262598000  | -0.100195000 |
| C | -4.509120000 | -0.641506000 | 0.122330000  |
| C | -4.039121000 | 0.641567000  | -0.314759000 |
| C | -2.727326000 | 0.972513000  | -0.170806000 |
| C | -1.762623000 | 0.079002000  | 0.409837000  |
| C | -2.244362000 | -1.207621000 | 0.831169000  |
| C | -3.545493000 | -1.557822000 | 0.699067000  |
| H | -4.705733000 | 1.372918000  | -0.743952000 |
| C | -0.465159000 | 0.488243000  | 0.540152000  |
| H | -1.534811000 | -1.904215000 | 1.261143000  |
| H | -3.858316000 | -2.539412000 | 1.018459000  |
| C | -0.048176000 | 1.788228000  | 0.110579000  |
| C | -1.051147000 | 2.689158000  | -0.512102000 |
| H | 0.278443000  | -0.166930000 | 0.979227000  |
| H | 2.334939000  | 1.717958000  | 2.011538000  |

|   |              |              |              |
|---|--------------|--------------|--------------|
| O | -2.347155000 | 2.212197000  | -0.601463000 |
| O | -0.844711000 | 3.791475000  | -0.942948000 |
| N | -5.793710000 | -0.981408000 | 0.001120000  |
| C | -6.334216000 | -2.266172000 | 0.499720000  |
| H | -7.372343000 | -2.075480000 | 0.773213000  |
| H | -5.819436000 | -2.540659000 | 1.418426000  |
| C | -6.257141000 | -3.384175000 | -0.540879000 |
| H | -6.794040000 | -3.113378000 | -1.452554000 |
| H | -5.223150000 | -3.614007000 | -0.805488000 |
| H | -6.715993000 | -4.286872000 | -0.131585000 |
| C | -6.793739000 | -0.095688000 | -0.634987000 |
| H | -6.331216000 | 0.422835000  | -1.473232000 |
| H | -7.557036000 | -0.748454000 | -1.058898000 |
| C | -7.425001000 | 0.886955000  | 0.352835000  |
| H | -8.178997000 | 1.482538000  | -0.166430000 |
| H | -7.914287000 | 0.359751000  | 1.174537000  |
| H | -6.680946000 | 1.566198000  | 0.773508000  |
| H | 2.473320000  | 1.873958000  | -1.877778000 |

*Coordinates of the transition state for  $ttt \rightarrow tct$*

|   |              |              |              |
|---|--------------|--------------|--------------|
| N | 4.606298000  | 1.131144000  | 0.457015000  |
| C | 5.522999000  | 0.345075000  | -0.245368000 |
| C | 6.831348000  | 0.645094000  | -0.621119000 |
| H | 7.296898000  | 1.589414000  | -0.368723000 |
| C | 7.543583000  | -0.321709000 | -1.340810000 |
| H | 8.563338000  | -0.107471000 | -1.640946000 |
| C | 6.968368000  | -1.547498000 | -1.673019000 |
| H | 7.538663000  | -2.282057000 | -2.229263000 |
| C | 5.650386000  | -1.831714000 | -1.283284000 |
| H | 5.203297000  | -2.786122000 | -1.540985000 |
| C | 4.936343000  | -0.885822000 | -0.568283000 |
| C | 3.509589000  | -0.923423000 | -0.036219000 |
| C | 3.427145000  | 0.430916000  | 0.698028000  |
| C | 4.883762000  | 2.438682000  | 1.014386000  |
| H | 5.790491000  | 2.841902000  | 0.568912000  |
| H | 5.017921000  | 2.391147000  | 2.101444000  |
| C | 3.296638000  | -2.107870000 | 0.926536000  |
| H | 3.457181000  | -3.051418000 | 0.398840000  |
| H | 2.276458000  | -2.121594000 | 1.318832000  |
| H | 3.990354000  | -2.062746000 | 1.768683000  |
| C | 2.504356000  | -0.997832000 | -1.208009000 |
| H | 2.681763000  | -1.907819000 | -1.786936000 |
| H | 2.610676000  | -0.140195000 | -1.875010000 |
| H | 1.476192000  | -1.028655000 | -0.843208000 |
| C | 2.435576000  | 0.911061000  | 1.476159000  |
| C | 1.175776000  | 0.261232000  | 1.843317000  |
| H | 1.183448000  | -0.324311000 | 2.764734000  |
| C | -4.964554000 | -0.165289000 | 0.012079000  |
| C | -3.832863000 | 0.520519000  | -0.540170000 |
| C | -2.623740000 | 0.450170000  | 0.081350000  |
| C | -2.415521000 | -0.304637000 | 1.284983000  |
| C | -3.556101000 | -0.990505000 | 1.826186000  |
| C | -4.769935000 | -0.927408000 | 1.229690000  |
| H | -3.914083000 | 1.121385000  | -1.432210000 |
| C | -1.167474000 | -0.338307000 | 1.838807000  |

|   |              |              |              |
|---|--------------|--------------|--------------|
| H | -3.424073000 | -1.573608000 | 2.729583000  |
| H | -5.594918000 | -1.470501000 | 1.662976000  |
| C | -0.055816000 | 0.357621000  | 1.256241000  |
| C | -0.303021000 | 1.183962000  | 0.045753000  |
| H | -0.993119000 | -0.910738000 | 2.743470000  |
| H | 2.578325000  | 1.865908000  | 1.979706000  |
| O | -1.591344000 | 1.145188000  | -0.476379000 |
| O | 0.482077000  | 1.887624000  | -0.524083000 |
| N | -6.161671000 | -0.104220000 | -0.575191000 |
| C | -7.372422000 | -0.726890000 | 0.005296000  |
| H | -8.214920000 | -0.114742000 | -0.317781000 |
| H | -7.332813000 | -0.646322000 | 1.089984000  |
| C | -7.569016000 | -2.176021000 | -0.442540000 |
| H | -7.640529000 | -2.247628000 | -1.529954000 |
| H | -6.748104000 | -2.813913000 | -0.109006000 |
| H | -8.497967000 | -2.560363000 | -0.015414000 |
| C | -6.384234000 | 0.600604000  | -1.856378000 |
| H | -5.506456000 | 0.479399000  | -2.488888000 |
| H | -7.199813000 | 0.077967000  | -2.356700000 |
| C | -6.738676000 | 2.076802000  | -1.667357000 |
| H | -6.930144000 | 2.527123000  | -2.643807000 |
| H | -7.637865000 | 2.191739000  | -1.058376000 |
| H | -5.926039000 | 2.627169000  | -1.189124000 |
| H | 4.062614000  | 3.125201000  | 0.792578000  |

*Coordinates of the transition state for **ctt** → **cct***

|   |              |              |              |
|---|--------------|--------------|--------------|
| N | -3.562405000 | 0.908823000  | 0.351507000  |
| C | -4.761882000 | 1.136571000  | -0.332003000 |
| C | -5.235781000 | 2.323805000  | -0.887304000 |
| H | -4.662145000 | 3.241307000  | -0.851366000 |
| C | -6.489206000 | 2.298829000  | -1.511348000 |
| H | -6.875895000 | 3.211874000  | -1.950318000 |
| C | -7.239811000 | 1.126167000  | -1.581459000 |
| H | -8.206499000 | 1.128999000  | -2.071152000 |
| C | -6.741242000 | -0.060778000 | -1.022136000 |
| H | -7.324623000 | -0.973840000 | -1.078817000 |
| C | -5.503120000 | -0.049799000 | -0.403164000 |
| C | -4.729301000 | -1.166187000 | 0.279847000  |
| C | -3.433325000 | -0.433524000 | 0.693061000  |
| C | -2.576655000 | 1.945893000  | 0.594469000  |
| H | -2.077648000 | 1.773265000  | 1.547470000  |
| H | -3.077297000 | 2.911688000  | 0.662042000  |
| C | -4.440831000 | -2.329117000 | -0.690185000 |
| H | -5.378271000 | -2.790058000 | -1.012142000 |
| H | -3.835274000 | -3.099315000 | -0.205988000 |
| H | -3.907564000 | -1.979853000 | -1.576781000 |
| C | -5.484454000 | -1.682926000 | 1.524189000  |
| H | -6.437675000 | -2.128302000 | 1.227404000  |
| H | -5.689220000 | -0.871088000 | 2.225966000  |
| H | -4.898367000 | -2.446459000 | 2.042500000  |
| C | -2.391661000 | -1.052713000 | 1.281284000  |
| C | -1.118322000 | -0.520990000 | 1.776668000  |
| H | -1.102495000 | -0.178699000 | 2.813436000  |
| C | 5.029707000  | 0.137556000  | 0.041041000  |
| C | 3.874795000  | -0.358822000 | -0.648578000 |

|   |              |              |              |
|---|--------------|--------------|--------------|
| C | 2.666301000  | -0.386429000 | -0.022280000 |
| C | 2.484681000  | 0.068197000  | 1.327559000  |
| C | 3.649828000  | 0.560545000  | 2.008765000  |
| C | 4.861933000  | 0.594634000  | 1.406324000  |
| H | 3.935535000  | -0.735082000 | -1.657576000 |
| C | 1.238297000  | 0.011541000  | 1.883615000  |
| H | 3.538888000  | 0.914861000  | 3.026438000  |
| H | 5.706061000  | 0.986782000  | 1.951315000  |
| C | 0.103048000  | -0.486980000 | 1.161939000  |
| C | 0.310028000  | -0.962799000 | -0.229739000 |
| H | 1.084820000  | 0.351630000  | 2.902116000  |
| H | -2.513736000 | -2.114140000 | 1.491590000  |
| O | 1.606469000  | -0.876038000 | -0.726804000 |
| O | -0.513753000 | -1.422104000 | -0.969082000 |
| N | 6.222955000  | 0.180854000  | -0.555736000 |
| C | 7.453273000  | 0.616786000  | 0.142000000  |
| H | 8.277442000  | 0.076669000  | -0.324810000 |
| H | 7.416656000  | 0.284876000  | 1.177876000  |
| C | 7.687073000  | 2.125068000  | 0.044470000  |
| H | 7.754542000  | 2.447459000  | -0.996796000 |
| H | 6.885361000  | 2.686876000  | 0.527849000  |
| H | 8.628382000  | 2.374875000  | 0.538976000  |
| C | 6.417597000  | -0.200421000 | -1.971555000 |
| H | 5.546043000  | 0.106416000  | -2.547702000 |
| H | 7.254173000  | 0.395180000  | -2.337590000 |
| C | 6.711079000  | -1.690986000 | -2.150477000 |
| H | 6.881168000  | -1.897994000 | -3.209315000 |
| H | 7.606173000  | -1.985655000 | -1.598621000 |
| H | 5.877765000  | -2.308481000 | -1.809598000 |
| H | -1.824157000 | 1.994864000  | -0.199731000 |

*Coordinates of the transition state for **ctc** → **ccc***

|   |             |              |              |
|---|-------------|--------------|--------------|
| N | 3.525199000 | 0.371776000  | -0.868899000 |
| C | 4.551309000 | -0.578377000 | -0.945723000 |
| C | 5.039437000 | -1.241513000 | -2.069463000 |
| H | 4.622066000 | -1.080090000 | -3.055416000 |
| C | 6.095607000 | -2.143093000 | -1.886971000 |
| H | 6.490889000 | -2.670894000 | -2.747736000 |
| C | 6.639385000 | -2.374848000 | -0.624445000 |
| H | 7.455316000 | -3.078095000 | -0.506171000 |
| C | 6.128083000 | -1.701022000 | 0.495534000  |
| H | 6.550578000 | -1.883015000 | 1.478079000  |
| C | 5.083666000 | -0.808041000 | 0.328699000  |
| C | 4.348792000 | 0.056158000  | 1.340921000  |
| C | 3.286156000 | 0.735788000  | 0.448794000  |
| C | 2.799433000 | 0.846673000  | -2.033738000 |
| H | 1.927856000 | 0.223561000  | -2.259580000 |
| H | 3.465119000 | 0.845652000  | -2.897280000 |
| C | 5.294081000 | 1.112551000  | 1.955275000  |
| H | 6.090239000 | 0.620819000  | 2.520391000  |
| H | 4.746683000 | 1.769167000  | 2.636565000  |
| H | 5.754231000 | 1.727935000  | 1.178833000  |
| C | 3.702612000 | -0.792924000 | 2.452699000  |
| H | 4.474961000 | -1.318696000 | 3.019992000  |
| H | 3.018723000 | -1.534997000 | 2.035016000  |

|   |              |              |              |
|---|--------------|--------------|--------------|
| H | 3.144543000  | -0.162680000 | 3.149738000  |
| C | 2.313369000  | 1.532575000  | 0.939457000  |
| C | 1.229339000  | 2.248204000  | 0.252989000  |
| H | 1.410089000  | 3.262774000  | -0.100237000 |
| C | -4.508989000 | -0.641535000 | 0.122362000  |
| C | -4.039024000 | 0.641528000  | -0.314799000 |
| C | -2.727242000 | 0.972522000  | -0.170865000 |
| C | -1.762514000 | 0.079071000  | 0.409840000  |
| C | -2.244216000 | -1.207551000 | 0.831226000  |
| C | -3.545332000 | -1.557803000 | 0.699128000  |
| H | -4.705659000 | 1.372828000  | -0.744040000 |
| C | -0.465075000 | 0.488371000  | 0.540165000  |
| H | -1.534642000 | -1.904102000 | 1.261233000  |
| H | -3.858121000 | -2.539392000 | 1.018557000  |
| C | -0.048135000 | 1.788352000  | 0.110520000  |
| C | -1.051126000 | 2.689211000  | -0.512231000 |
| H | 0.278558000  | -0.166725000 | 0.979305000  |
| H | 2.334970000  | 1.718159000  | 2.011498000  |
| O | -2.347112000 | 2.212190000  | -0.601600000 |
| O | -0.844723000 | 3.791511000  | -0.943131000 |
| N | -5.793574000 | -0.981457000 | 0.001184000  |
| C | -6.334056000 | -2.266226000 | 0.499800000  |
| H | -7.372165000 | -2.075534000 | 0.773361000  |
| H | -5.819220000 | -2.540737000 | 1.418465000  |
| C | -6.257046000 | -3.384201000 | -0.540834000 |
| H | -6.793991000 | -3.113377000 | -1.452474000 |
| H | -5.223070000 | -3.614029000 | -0.805505000 |
| H | -6.715881000 | -4.286907000 | -0.131542000 |
| C | -6.793638000 | -0.095742000 | -0.634879000 |
| H | -6.331164000 | 0.422778000  | -1.473154000 |
| H | -7.556961000 | -0.748510000 | -1.058740000 |
| C | -7.424843000 | 0.886909000  | 0.352974000  |
| H | -8.178911000 | 1.482445000  | -0.166240000 |
| H | -7.914030000 | 0.359711000  | 1.174738000  |
| H | -6.680773000 | 1.566194000  | 0.773554000  |
| H | 2.472878000  | 1.873705000  | -1.877973000 |

## Spectroscopic data

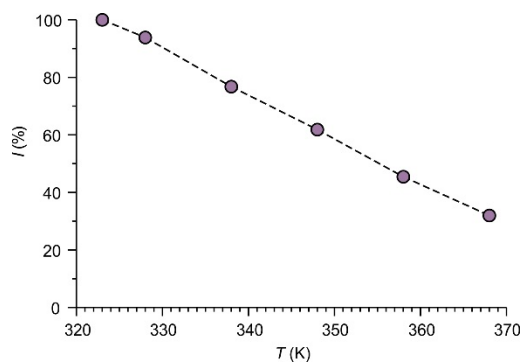

**Fig. S2.** Dependence of the relative emission intensity ( $\lambda_{\text{Ex}} = 550$  nm) of the hexafluorophosphate salt of **3** on the solution temperature in glycerol/MeCN (94:6, v/v).

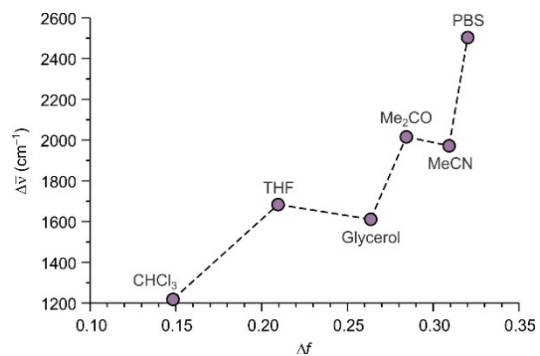

**Fig. S3.** Dependence of the Stokes' shift of the hexafluorophosphate salt of **3** on the orientation polarizability of the solvent at 298 K.

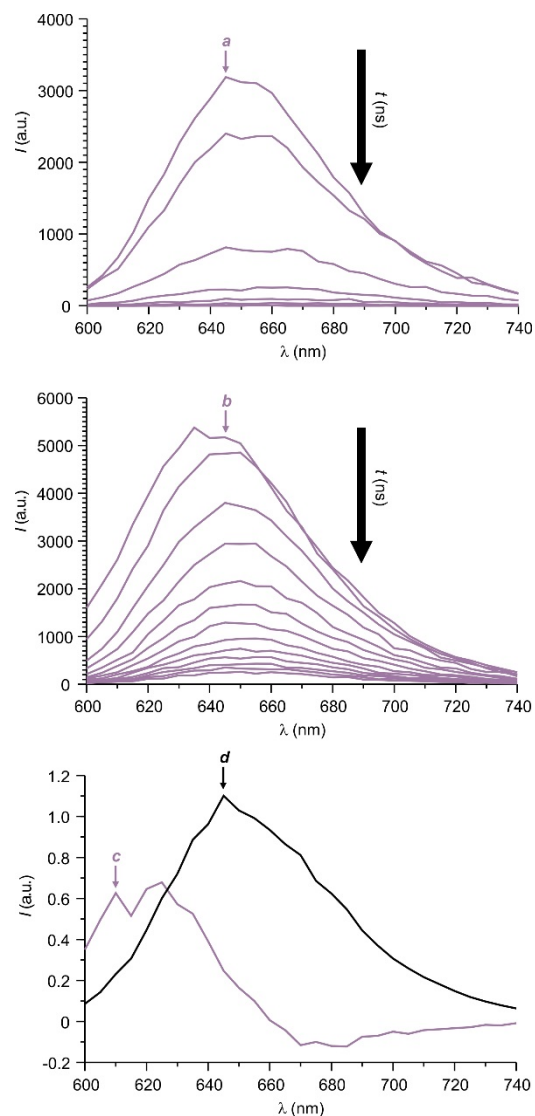

**Fig. S4.** Time-resolved emission spectra of the hexafluorophosphate salt of **3** ( $7 \mu\text{M}$ ) recorded in either MeCN (**a**) or glycerol (**b**) at 298 K over the course of 6 ns after the led pulse (502 nm, 900 ps pulse width,  $\sim 1$  pJ per pulse). Emission spectra of the two components with  $\tau$  of 0.51 (37%, **c**) and 1.84 ns (63%, **d**), observed in glycerol, recovered from global analysis of the fluorescence decays.

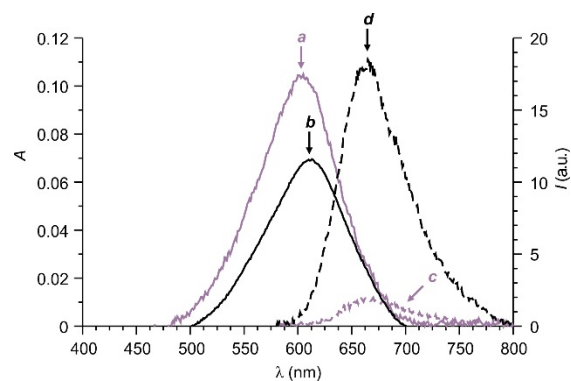

**Fig. S5.** Absorption (**a** and **b**) and emission ( $\lambda_{\text{Ex}} = 550$  nm, **c** and **d**) spectra of the hexafluorophosphate salt of **4** (1  $\mu\text{M}$ ) in either MeCN (**a** and **c**) or glycerol/MeCN (94:6, v/v, **b** and **d**) at 298 K.

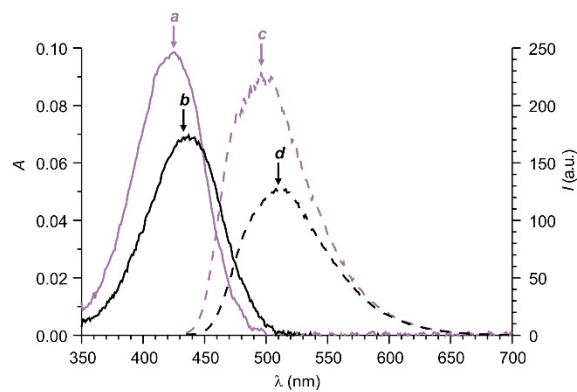

**Fig. S6.** Absorption (**a** and **b**) and emission ( $\lambda_{\text{Ex}} = 420$  nm, **c** and **d**) spectra of **5** (2  $\mu\text{M}$ ) in either MeCN (**a** and **c**) or glycerol/MeCN (98:2, v/v, **b** and **d**) at 298 K.
